# Supplementary figures and images for: Historical and projected improvements in net energy performance of power generation technologies
Source: Royal Society of Chemistry journal article supplement (doi:10.1039/c8ee01231h), 2018-01-01

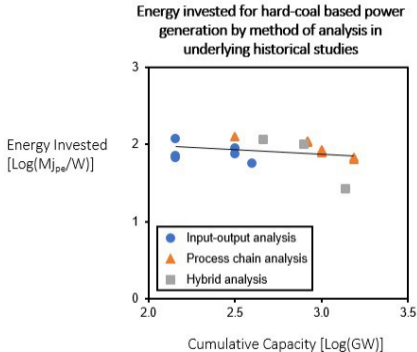

Supplement: c8ee01231h3.pdf [file c8ee01231h3.pdf]
